# Supplementary material
Source: PubMed Central journal article supplement (PMC3309773)
Supplement: 1115029109_pnas.201115029SI.pdf [file 1115029109_pnas.201115029SI.pdf]

# Supporting Information

Ezell et al. 10.1073/pnas.1115029109

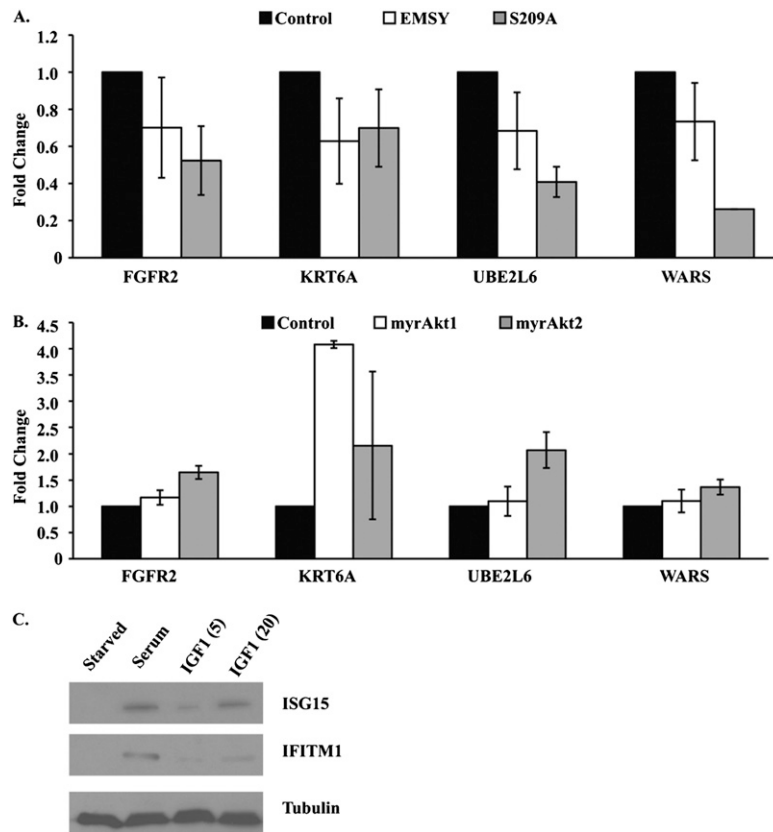

**Fig. S1.** Regulation of ISG expression by EMSY and Akt1. (A) HMEC-tert cells were transduced with WT EMSY or S209A EMSY, and gene expression was measured by real-time RT-PCR. (B) HMEC-tert cells were transduced with myrAkt1 or myrAkt2. Error bars show the SD ( $n = 3$ ). (C) HMEC-tert cells were serum-starved overnight and stimulated with serum, insulin-like growth factor 1 (IGF1; 5 ng/ $\mu$ L), or IGF1 (20 ng/ $\mu$ L). Cell lysates were harvested 4 h after stimulation and probed with the indicated antibodies.
